# Supplementary material
Source: PubMed Central journal article supplement (PMC10840669)
Supplement: NIHMS1929398-supplement-Figure_S2.pdf [file NIHMS1929398-supplement-Figure_S2.pdf]

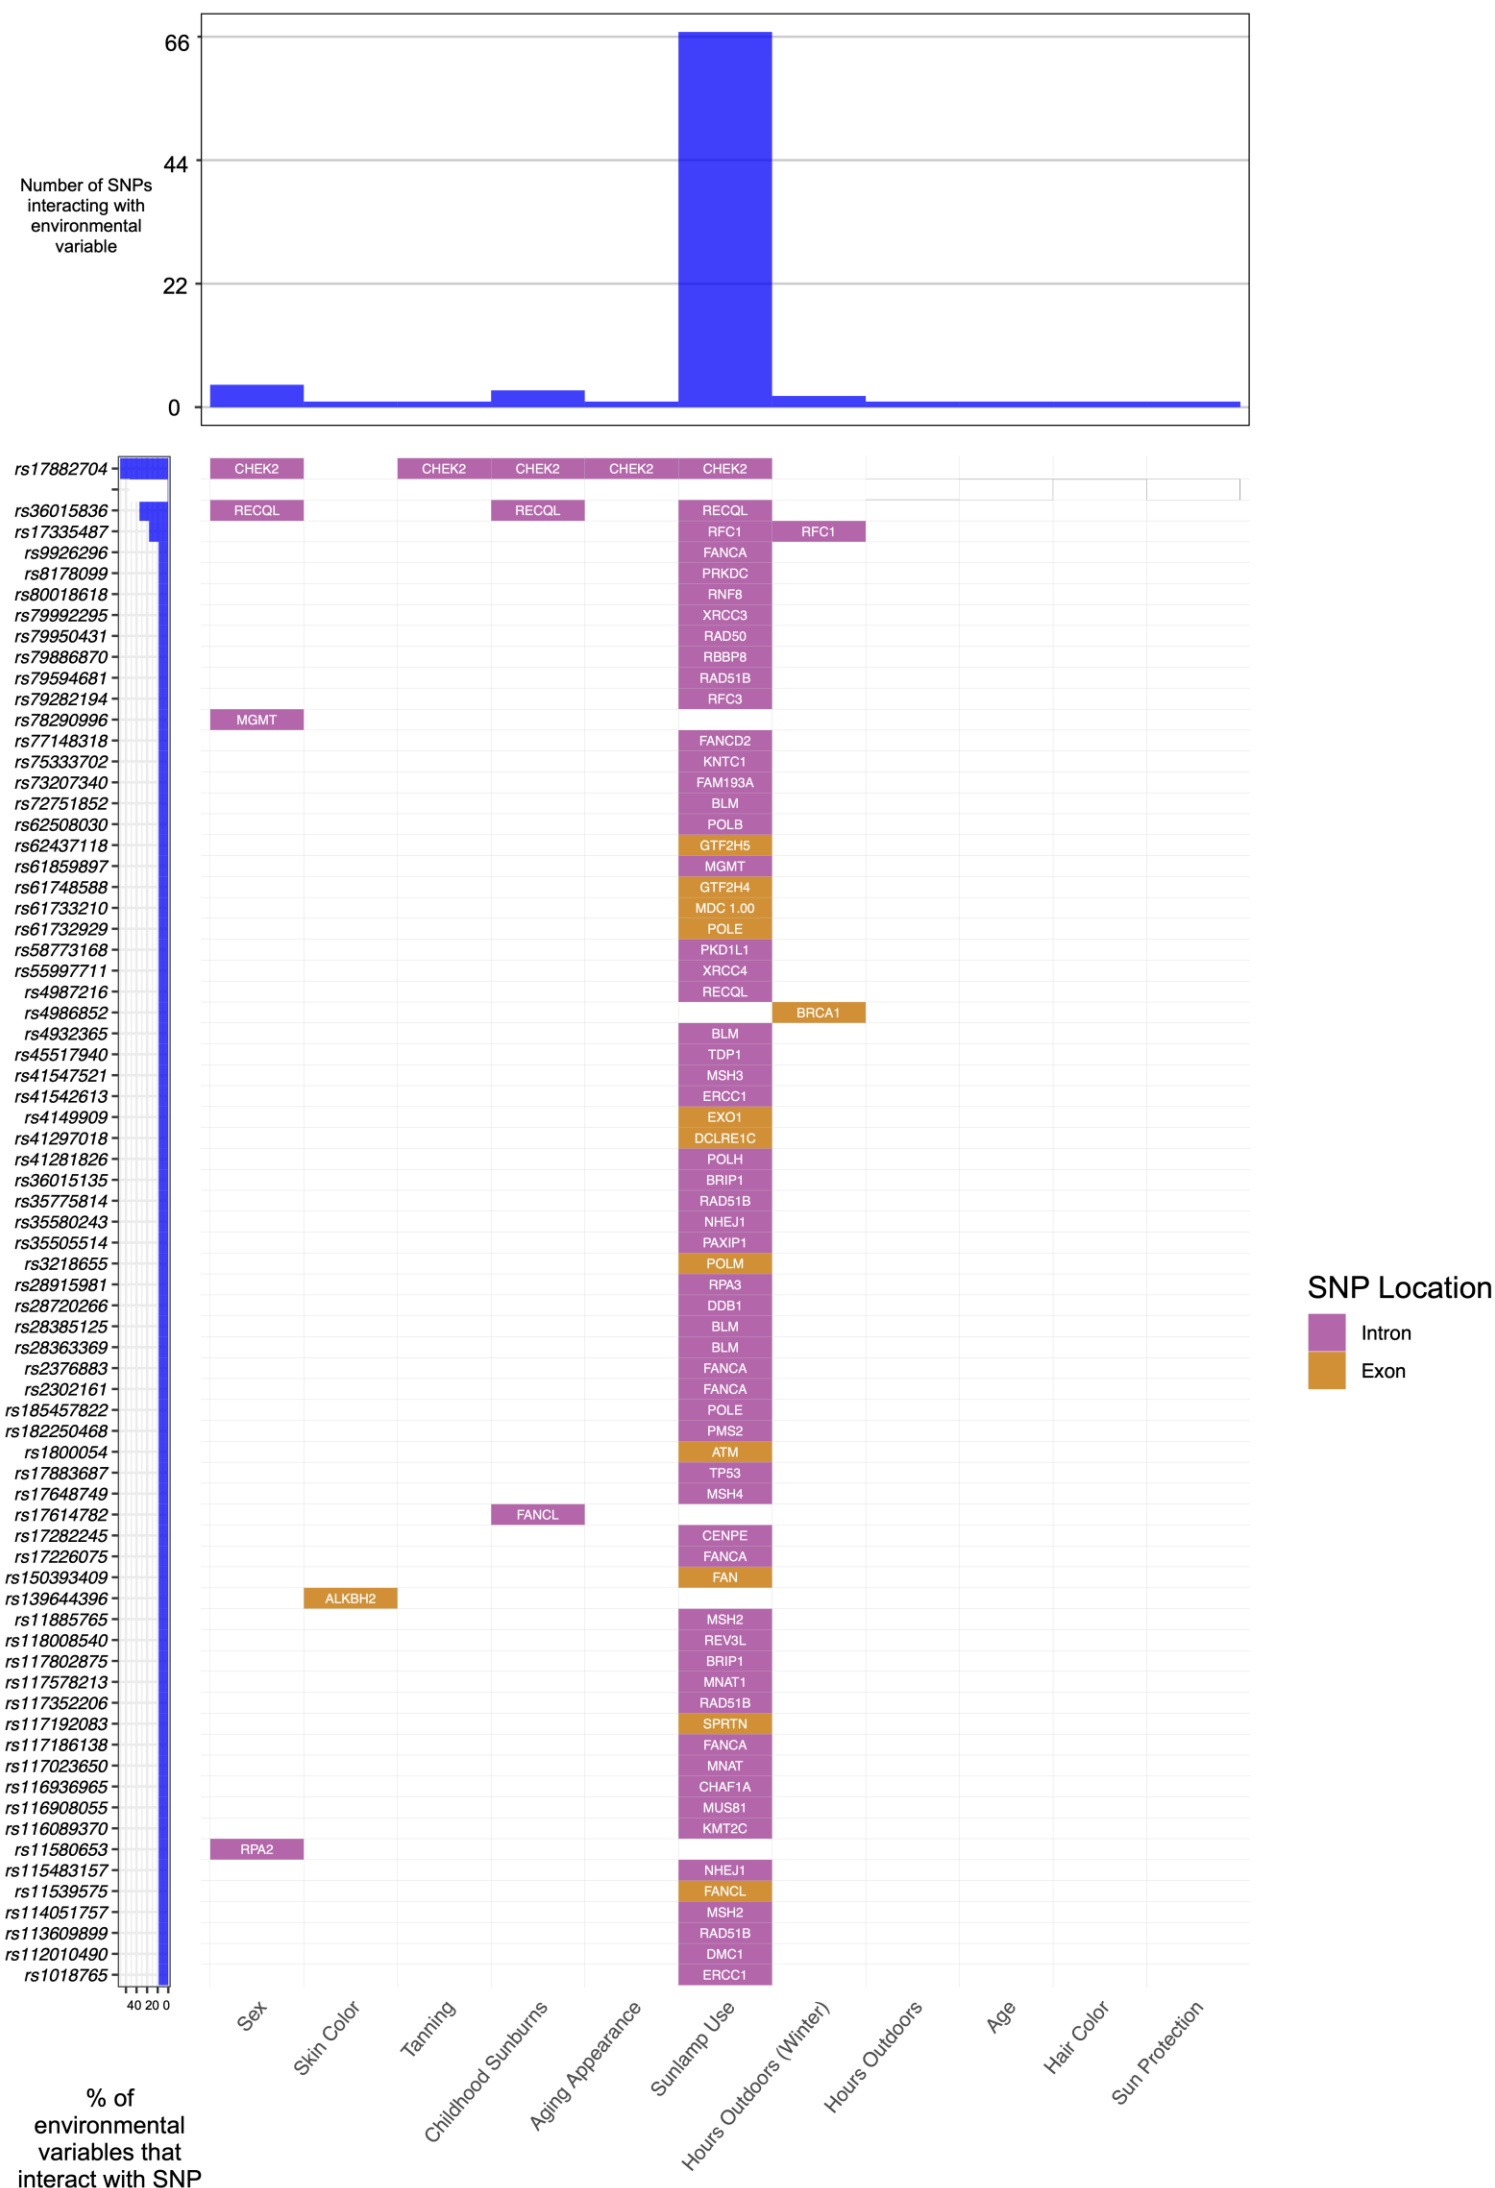

**Figure S2.** Waterfall plot highlighting SNP-environment interactions in cutaneous squamous cell carcinoma (cSCC).

Relationships were computed using a robust joint interaction test and assessed for significance using the False Discovery Rate (FDR) method. These findings highlight sunlamp use as a major interacting factor with DNA repair genes to mediate the risk of cSCC. This figure also highlights *CHEK2* as a critical gene which interact with sex, ease of tanning, history of childhood sunburns, subjective aging appearance and sunlamp use.
