# Supplementary material
Source: PubMed Central journal article supplement (PMC10840669)
Supplement: NIHMS1929398-supplement-Table_S1.pdf [file NIHMS1929398-supplement-Table_S1.pdf]

**Table S1.** Selected genes that are involved in DNA repair mechanisms.

| Gene name |        |        |        |         |
|-----------|--------|--------|--------|---------|
| ALKBH2    | ERCC5  | MMS19  | POLN   | SHPRH   |
| ALKBH3    | ERCC6  | MNAT1  | POLQ   | SLX1A   |
| APEX1     | ERCC8  | MPG    | PRKDC  | SLX4    |
| APEX2     | EXO1   | MPLKIP | PRPF19 | SMUG1   |
| APLF      | FAAP20 | MRE11  | RAD1   | SPO11   |
| APTX      | FAAP24 | MSH2   | RAD17  | SPRTN   |
| ATM       | FAN1   | MSH3   | RAD18  | TDG     |
| ATR       | FANCA  | MSH4   | RAD23A | TDP1    |
| ATRIP     | FANCB  | MSH5   | RAD23B | TDP2    |
| AURKB     | FANCC  | MSH6   | RAD50  | TOPBP1  |
| BAP1      | FANCD2 | MUS81  | RAD51  | TP53    |
| BARD1     | FANCE  | MUTYH  | RAD51B | TP53BP1 |
| BLM       | FANCF  | NBN    | RAD51C | TREX2   |
| BRCA1     | FANCG  | NEIL1  | RAD51D | TTK     |
| BRCA2     | FANCI  | NEIL2  | RAD52  | UBE2A   |
| BRIP1     | FANCL  | NEIL3  | RAD54B | UBE2B   |
| BUB1      | FANCM  | NHEJ1  | RAD54L | UBE2N   |
| CCNH      | FEN1   | NTHL1  | RAD9A  | UBE2V2  |
| CDK12     | GEN1   | NUDT1  | RBBP8  | UNG     |
| CDK7      | GPN1   | OGG1   | RDM1   | UVSSA   |
| CENPE     | GTF2H1 | PALB2  | RECQL  | WRN     |
| CETN2     | GTF2H2 | PARP1  | RECQL4 | XPA     |
| CHAF1A    | GTF2H3 | PARP2  | RECQL5 | XPC     |
| CHEK1     | GTF2H4 | PARP3  | REV1   | XRCC1   |
| CHEK2     | GTF2H5 | PAXIP1 | REV3L  | XRCC2   |
| CLK2      | H2AFX  | PCNA   | RFC1   | XRCC3   |
| CRIP1     | HELQ   | PER1   | RFC2   | XRCC4   |
| DCLRE1A   | HLTF   | PMS1   | RFC3   | XRCC5   |
| DCLRE1B   | HUS1   | PMS2   | RFC4   | XRCC6   |
| DCLRE1C   | KMT2C  | PMS2P3 | RFC5   | ZW10    |
| DDB1      | KNTC1  | PNKP   | RNF168 |         |
| DDB2      | LIG1   | POLB   | RNF4   |         |
| DMC1      | LIG3   | POLD1  | RNF8   |         |
| DUT       | LIG4   | POLE   | RPA1   |         |
| EME1      | MAD2L2 | POLG   | RPA2   |         |
| ENDOV     | MBD4   | POLH   | RPA3   |         |
| ERCC1     | MDC1   | POLI   | RPA4   |         |
| ERCC2     | MGMT   | POLK   | RRM2B  |         |
| ERCC3     | MLH1   | POLL   | SEM1   |         |
| ERCC4     | MLH3   | POLM   | SETMAR |         |
