# Supplementary material
Source: PubMed Central journal article supplement (PMC10840669)
Supplement: NIHMS1929398-supplement-Table_S2.pdf [file NIHMS1929398-supplement-Table_S2.pdf]

**Table S2.** Ratios corresponding to skin cancer risk for each demographic and environmental variables.

| Values are expressed as relative risk (RR) of variable found in disease versus healthy control |          |          |            |                   |                  |             |                     |              |                     |                    | Hair     |             |            |          | Skin Appearance        |                  | Sunscreen use |                  |          | Exposure            |                       |                            |                                     |
|------------------------------------------------------------------------------------------------|----------|----------|------------|-------------------|------------------|-------------|---------------------|--------------|---------------------|--------------------|----------|-------------|------------|----------|------------------------|------------------|---------------|------------------|----------|---------------------|-----------------------|----------------------------|-------------------------------------|
|                                                                                                | Age      | Male Sex | Skin: Fair | Skin: Light Olive | Skin: Dark Olive | Skin: Brown | Mild/occasional Tan | Moderate Tan | Strong/frequent Tan | Childhood Sunburns | Blonde   | Light Brown | Dark Brown | Black    | Age-matched Appearance | Older Appearance | Sometimes     | Most of the time | Always   | No outdoor exposure | Annual Sunlamp Visits | Daily Hours Spent Outdoors | Daily Hours Spent Outdoors (Winter) |
| BCC                                                                                            | 1.031736 | 1.230265 | 0.727386   | 0.476621          | 0.460377         | 0.502446    | 0.819101            | 0.749394     | 0.657134            | 1.031848           | 0.744668 | 0.681603    | 0.552734   | 0.631684 | 1.078295               | 0.78878          | 1.315135      | 1.787393         | 2.402969 | 1.26024             | 0.973708              | 1.053163                   | 1.038386                            |
| cSCC                                                                                           | 1.119279 | 1.971642 | 0.61838    | 0.333618          | 0.263341         | 9.41E-73    | 0.721631            | 0.626581     | 0.586538            | 1.032178           | 0.682202 | 0.479205    | 0.383558   | 0.633368 | 1.262964               | 1.283703         | 1.238767      | 1.51585          | 2.256411 | 1.846216            | 0.978829              | 1.08204                    | 1.080678                            |
| MMinsitu                                                                                       | 1.020726 | 0.828783 | 0.804794   | 0.553287          | 0.652044         | 0.457656    | 0.812851            | 0.690063     | 0.589309            | 1.032827           | 0.599882 | 0.533018    | 0.443554   | 0.564571 | 0.909932               | 0.892441         | 1.871008      | 2.600176         | 3.580192 | 1.548781            | 0.989828              | 1.011001                   | 0.999402                            |
| MMinvasive                                                                                     | 0.968732 | 0.868348 | 0.576765   | 0.30065           | 0.169394         | 0.366801    | 0.856938            | 0.606841     | 0.484805            | 1.032557           | 0.723628 | 0.476645    | 0.346359   | 0.270559 | 1.072664               | 0.868433         | 1.363966      | 2.241589         | 3.921962 | 4.322825            | 0.964349              | 1.002978                   | 0.997636                            |
| <b>P-values for relative risk ratios calculated using the Wald test</b>                        |          |          |            |                   |                  |             |                     |              |                     |                    |          |             |            |          |                        |                  |               |                  |          |                     |                       |                            |                                     |
|                                                                                                | Age      | Male Sex | Fair       | Light Olive       | Dark Olive       | Brown       | Mild/occasional Tan | Moderate Tan | Strong/frequent Tan | Childhood Sunburns | Blonde   | Light Brown | Dark Brown | Black    | Age-matched Appearance | Older Appearance | Sometimes     | Most of the time | Always   | No outdoor exposure | Annual Sunlamp Visits | Daily Hours Spent Outdoors | Daily Hours Spent Outdoors (Winter) |
| BCC                                                                                            | 0        | 0        | 0          | 0                 | 0                | 8.69E-07    | 0                   | 0            | 0                   | 0                  | 2.89E-15 | 0           | 0          | 0        | 5.36E-05               | 0.000268         | 2.75E-13      | 0                | 0        | 0.068186            | 3.49E-14              | 0                          | 0                                   |
| cSCC                                                                                           | 0        | 0        | 6.66E-15   | 0                 | 8.80E-08         | NA          | 1.28E-07            | 0            | 4.44E-16            | 0                  | 1.50E-05 | 0           | 0          | 3.62E-05 | 1.72E-06               | 0.080632         | 0.027077      | 1.14E-05         | 0        | 0.025068            | 0.014231              | 0                          | 1.11E-15                            |
| MMinsitu                                                                                       | 2.18E-08 | 0.001711 | 0.026707   | 1.16E-06          | 0.108709         | 0.181331    | 0.017999            | 2.54E-06     | 3.63E-08            | 0                  | 0.000104 | 2.02E-08    | 1.35E-12   | 0.000597 | 0.198883               | 0.616852         | 0.00017       | 4.74E-09         | 1.09E-14 | 0.404201            | 0.297614              | 0.377909                   | 0.970791                            |
| MMinvasive                                                                                     | 0        | 1.92E-05 | 0          | 0                 | 3.06E-14         | 0.001023    | 0.000871            | 0            | 0                   | 0                  | 1.16E-06 | 0           | 0          | 0        | 0.072634               | 0.279127         | 0.000568      | 0                | 0        | 4.44E-16            | 2.03E-05              | 0.668178                   | 0.794248                            |

BCC was positively correlated with male sex (RR=1.23) and frequent use of sunscreen (RR=2.40); and inversely correlated with light olive, dark olive or brown skin (RR=0.47~0.50), ease of tanning (RR=0.66), dark brown hair (RR=0.5), and older than expected appearance (RR = 0.79). cSCC was positively correlated with male sex (RR=1.97), older-than-expected appearance (RR=1.28), frequent (“always”) use of sunscreen (RR=2.26); and inversely correlated with light olive, dark olive or brown skin (RR<0.33), ease of tanning (RR=0.58), as well as light brown, blonde, dark brown hair and black hair (RR=0.38~0.68). M-is was directly correlated occasional, frequent and very frequent use of sunscreen (RR=1.87~3.58); and inversely correlated with light olive, dark olive and brown skin (RR=0.46~0.65), blonde, light brown, dark brown and black hair (RR<0.60), and ease of tanning (RR=0.59). M-inv was positively correlated with occasional, frequent and very frequent use of sunscreen (RR=1.36~3.92); and inversely correlated with fair, light olive, dark olive and brown skin (RR=0.17~0.58), as well as blonde, light brown, dark brown and black hair (RR=0.27~0.72).
